# Supplementary material for: Direct laser writing of hydrophobic and hydrophilic valves in the same material applied to centrifugal microfluidics
Source: Royal Society of Chemistry journal article supplement (doi:10.1039/d3ra01749d), 2023-01-01
Supplement: d3ra01749d1.pdf [file d3ra01749d1.pdf]

## Supplementary information for:

### Direct laser writing of hydrophobic and hydrophilic valves in the same material applied to centrifugal microfluidics

#### Disk and layers

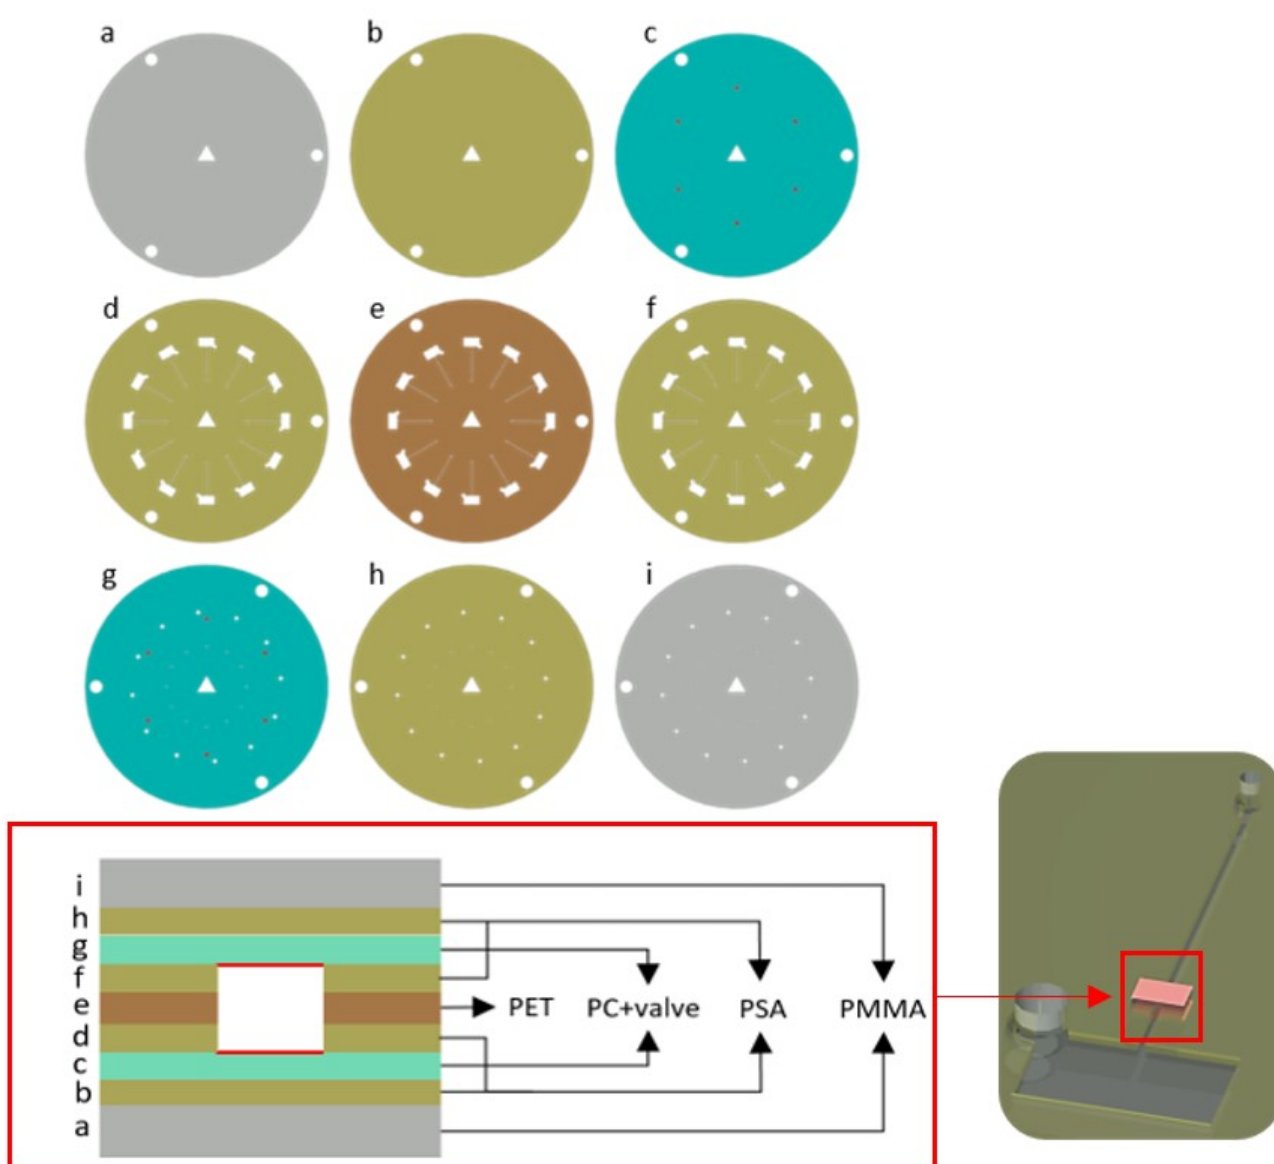

Figure A1 – Disk layers.

## Disk dimensions

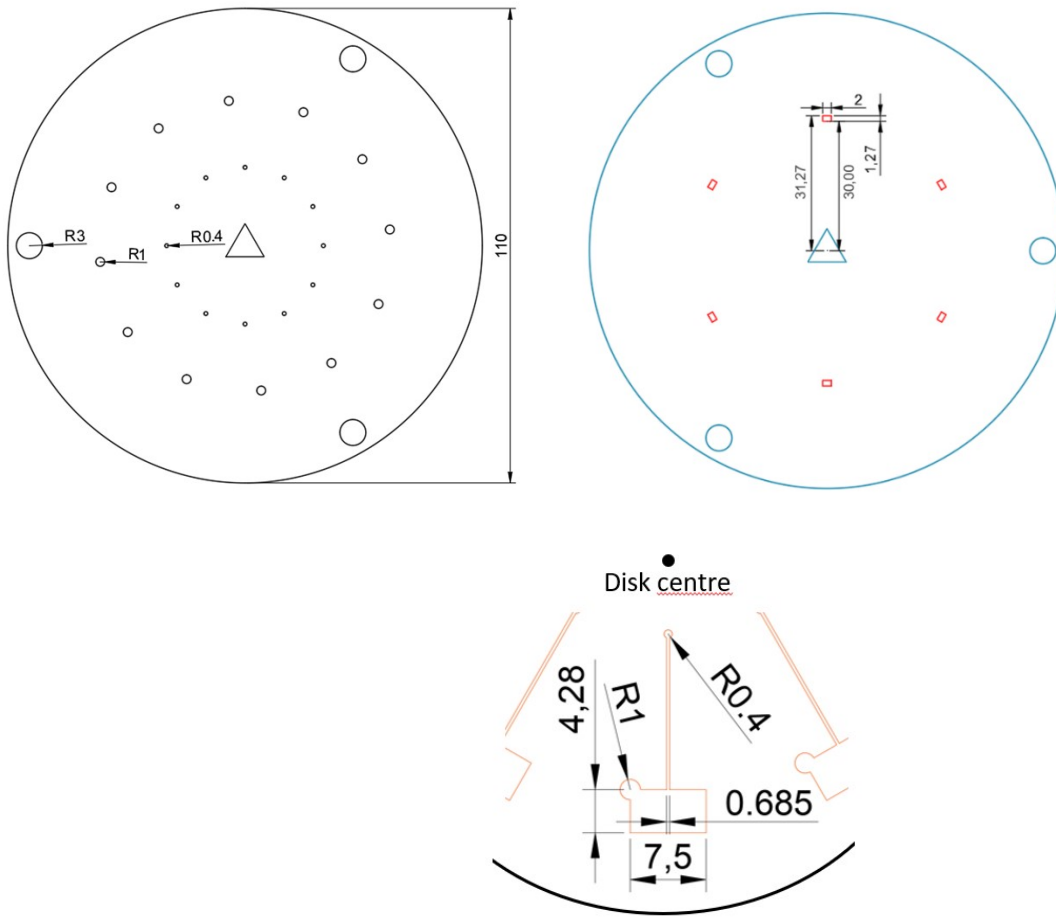

**Figure A2** - Extra dimensions (mm) on the microfluidic circuit in the disks. (top/left) Top layer of PMMA, (top/right) layer of PC showing the distance of the valves and (bottom) the circuit layers that were cut on the PSA-PET-PSA assembly.

Laser ablation details

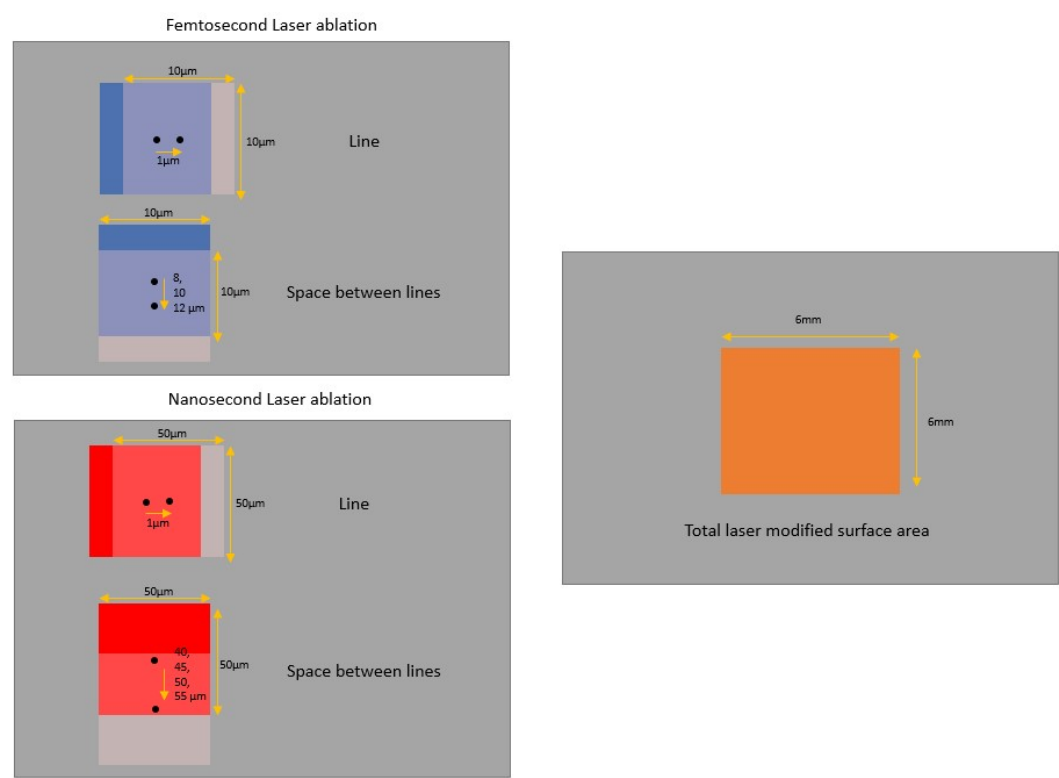

Figure A3 – Ablation procedures showing the spot sizes, and the stage movement direction to create the lines and space between lines.

Microfluidic device made to measure the contact angle inside the channel

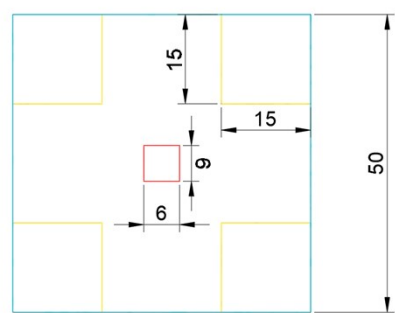

Figure A4 - Extra dimensions (mm) for the built microfluidic device for contact angle measurement inside of the channel.

## Table for hydrophobic surface.

**Table A1** - Table of values for the hydrophobic surfaces seen in **Figure 2**.

| Spacing between laser passes (um) | Fluid flow | Power   | Contact angle (°) | Stdv (°) |
|-----------------------------------|------------|---------|-------------------|----------|
| 40                                | Advancing  | 13mW    | 149               | 4        |
|                                   |            | 5mW     | 145               | 6        |
|                                   | Receding   | 13mW    | 143               | 4        |
|                                   |            | 5mW     | 135               | 5        |
|                                   | Static     | 13mW    | 126               | 2        |
|                                   |            | 5mW     | 129               | 1        |
| 45                                | Advancing  | 13mW    | 154               | 4        |
|                                   |            | 5mW     | 159               | 5        |
|                                   | Receding   | 13mW    | 142               | 6        |
|                                   |            | 5mW     | 154               | 3        |
|                                   | Static     | 13mW    | 129               | 2        |
|                                   |            | 5mW     | 136               | 1        |
| 50                                | Advancing  | 13mW    | 149               | 4        |
|                                   |            | 5mW     | 152               | 5        |
|                                   | Receding   | 13mW    | 145               | 4        |
|                                   |            | 5mW     | 149               | 3        |
|                                   | Static     | 13mW    | 132               | 2        |
|                                   |            | 5mW     | 129               | 2        |
| 55                                | Advancing  | 13mW    | 164               | 5        |
|                                   |            | 5mW     | 158               | 5        |
|                                   | Receding   | 13mW    | 156               | 4        |
|                                   |            | 5mW     | 155               | 5        |
|                                   | Static     | 13mW    | 147               | 1        |
|                                   |            | 5mW     | 132               | 1        |
| N/A                               | Advancing  | Control | 84                | 3        |
|                                   | Receding   | Control | 82                | 3        |
|                                   | Static     | Control | 79                | 3        |

Capillary force in the microchannels produced by nanosecond laser

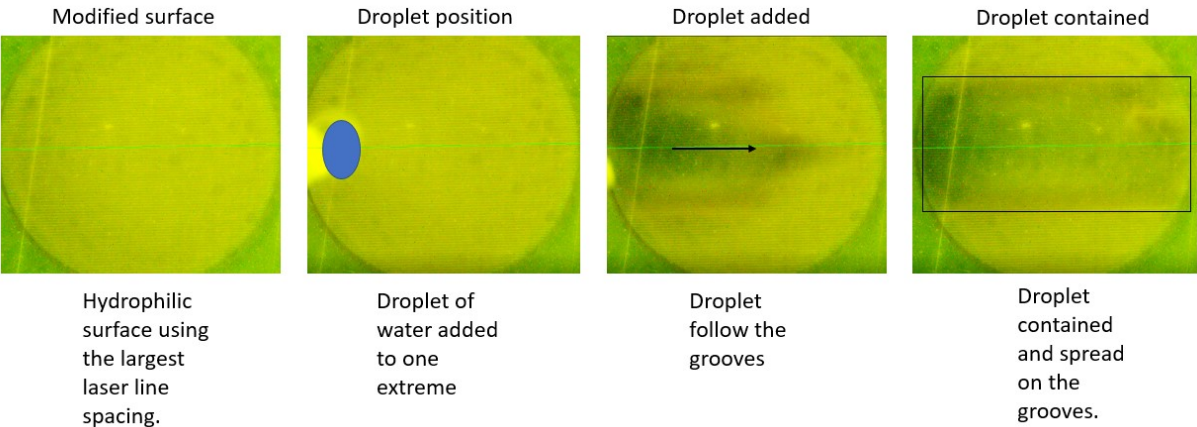

Figure A5 – Fluid pulled and contained by the capillary force created by the nanosecond laser surface medication using the largest spacing.
